# Supplementary material for: Two groups of copperII pyridine–triazole complexes with “open or close” pepper rings and their in vitro antitumor activities
Source: Royal Society of Chemistry journal article supplement (doi:10.1039/c9ra10677d), 2020-01-01
Supplement: c9ra10677d1.pdf [file c9ra10677d1.pdf]

## **Supporting information for**

### **Two groups of copper<sup>II</sup> pyridine-triazole complex with “open or close” pepper rings and their in-vitro antitumor activities**

ZhaoGuo Hong<sup>a</sup>, Chu Zheng<sup>a</sup>, Bi Luo<sup>a</sup>, Xin You<sup>a</sup>, HeDong Bian<sup>b</sup>, Hong Liang<sup>a</sup>,  
FengZhen Chen<sup>\*a</sup> and FuPing Huang<sup>\*a</sup>

<sup>a</sup> State Key Laboratory for Chemistry and Molecular Engineering of Medicinal Resources,  
School of Chemistry and Pharmacy, Guangxi Normal University, Guilin 541004, PR China

<sup>b</sup> School of Chemistry and Chemical Engineering, Guangxi University for Nationalities, Key  
Laboratory of Chemistry and Engineering of Forest Products, Nanning 530008, PR China

**Table S1** Crystallographic data and structure refinement parameters for complexes **C1-C6**

| Complex                                      | C1                                                                                                         | C2                                                                                      | C3                                                                                                                   |
|----------------------------------------------|------------------------------------------------------------------------------------------------------------|-----------------------------------------------------------------------------------------|----------------------------------------------------------------------------------------------------------------------|
| Empirical formula                            | C <sub>15</sub> H <sub>14</sub> Cl <sub>2</sub> CuN <sub>4</sub> O <sub>2</sub><br>·0.25(H <sub>2</sub> O) | C <sub>30</sub> H <sub>28</sub> ClCuN <sub>8</sub> O <sub>8</sub> ·<br>ClO <sub>4</sub> | C <sub>30</sub> H <sub>26</sub> Cu <sub>2</sub> N <sub>12</sub> O <sub>14</sub> ·<br>C <sub>2</sub> H <sub>3</sub> N |
| Formula weight<br>( <i>M</i> )               | 421.24                                                                                                     | 827.04                                                                                  | 946.76                                                                                                               |
| Crystal system                               | Monoclinic                                                                                                 | Monoclinic                                                                              | Monoclinic                                                                                                           |
| Space group                                  | <i>P2<sub>1</sub>/n</i>                                                                                    | <i>P2<sub>1</sub>/n</i>                                                                 | <i>P2<sub>1</sub>/n</i>                                                                                              |
| <i>a</i> (Å)                                 | 10.2362(5)                                                                                                 | 8.6128(4)                                                                               | 13.6199(3)                                                                                                           |
| <i>b</i> (Å)                                 | 17.5970(6)                                                                                                 | 18.2300(7)                                                                              | 12.0853(3)                                                                                                           |
| <i>c</i> (Å)                                 | 10.3334(10)                                                                                                | 21.5956(9)                                                                              | 23.0230(5)                                                                                                           |
| $\alpha$ (°)                                 | 90.00                                                                                                      | 90.00                                                                                   | 90.00                                                                                                                |
| $\beta$ (°)                                  | 109.474(8)                                                                                                 | 94.990 (4)                                                                              | 98.247(2)                                                                                                            |
| $\gamma$ (°)                                 | 90.00                                                                                                      | 90.00                                                                                   | 90.00                                                                                                                |
| <i>V</i> ( Å <sup>3</sup> )                  | 1754.8 (2)                                                                                                 | 3377.9 (2)                                                                              | 3750.40(15)                                                                                                          |
| <i>Z</i>                                     | 4                                                                                                          | 4                                                                                       | 4                                                                                                                    |
| <i>D<sub>c</sub></i> ( Mg cm <sup>-3</sup> ) | 1.593                                                                                                      | 1.626                                                                                   | 1.677                                                                                                                |
| <i>F</i> (000)                               | 852                                                                                                        | 1692                                                                                    | 1928                                                                                                                 |
| $\theta$ range for data<br>collection (°)    | 4.0-26.3                                                                                                   | 3.7-26.5                                                                                | 3.7-27.8                                                                                                             |
| Reflections<br>collected/unique              | 10804 /3216<br>[ <i>R</i> (int) =0.038]                                                                    | 21681/6888<br>[ <i>R</i> (int) =0.038]                                                  | 27321/7617<br>[ <i>R</i> (int) =0.033]                                                                               |
| Goodness-of-fit<br>on <i>F</i> <sup>2</sup>  | 1.05                                                                                                       | 1.05                                                                                    | 1.02                                                                                                                 |

|                                        |                                         |                                         |                                         |
|----------------------------------------|-----------------------------------------|-----------------------------------------|-----------------------------------------|
| Final $R$ indices [ $I > 2\sigma(I)$ ] | $R_1 = 0.0541$<br>$\omega R_2 = 0.1551$ | $R_1 = 0.0639$<br>$\omega R_2 = 0.1787$ | $R_1 = 0.0584$<br>$\omega R_2 = 0.0997$ |
| $R$ indices (all data)                 | $R_1 = 0.0766$<br>$\omega R_2 = 0.1724$ | $R_1 = 0.2089$<br>$\omega R_2 = 0.0895$ | $R_1 = 0.0402$<br>$\omega R_2 = 0.1094$ |

| Complex                                | C4                                                | C5                                        | C6                                              |
|----------------------------------------|---------------------------------------------------|-------------------------------------------|-------------------------------------------------|
| Empirical formula                      | $C_{16}H_{16}Cl_2CuN_4O_3 \cdot S \cdot C_2H_6OS$ | $C_{14}H_{10}CuN_4O_6S \cdot CH_4O$       | $C_{28}H_{18}Cu_2N_{10}O_{10} \cdot CH_3CH_2OH$ |
| Formula weight ( $M$ )                 | 556.99                                            | 457.90                                    | 827.69                                          |
| Crystal system                         | Monoclinic                                        | Monoclinic                                | Monoclinic                                      |
| Space group                            | $P2_1/c$                                          | $P2_1$                                    | $P2_1/c$                                        |
| $a$ (Å)                                | 9.6197(12)                                        | 10.616(3)                                 | 11.0710(6)                                      |
| $b$ (Å)                                | 22.809(3)                                         | 7.3808(18)                                | 33.288(2)                                       |
| $c$ (Å)                                | 13.0632(12)                                       | 10.876(3)                                 | 26.7627(11)                                     |
| $\alpha$ (°)                           | 90.00                                             | 90.00                                     | 90.00                                           |
| $\beta$ (°)                            | 127.446(6)                                        | 100.629(4)                                | 100.081(5)                                      |
| $\gamma$ (°)                           | 90.00                                             | 90.00                                     | 90.00                                           |
| $V$ (Å <sup>3</sup> )                  | 2275.6(5)                                         | 837.6(4)                                  | 9710.6(9)                                       |
| $Z$                                    | 4                                                 | 2                                         | 12                                              |
| $D_c$ (Mg cm <sup>-3</sup> )           | 1.626                                             | 1.816                                     | 1.698                                           |
| $F(000)$                               | 1140                                              | 466                                       | 5039                                            |
| $\theta$ range for data collection (°) | 2.2-26.3                                          | 2.5-26.3                                  | 3.7-21.4                                        |
| Reflections collected/unique           | 26984/4110<br>[ $R(\text{int}) = 0.032$ ]         | 10173/3028<br>[ $R(\text{int}) = 0.032$ ] | 109498/8449<br>[ $R(\text{int}) = 0.148$ ]      |
| Goodness-of-fit on $F^2$               | 1.10                                              | 1.05                                      | 1.02                                            |
| Final $R$ indices [ $I > 2\sigma(I)$ ] | $R_1 = 0.0279$<br>$\omega R_2 = 0.0818$           | $R_1 = 0.0284$<br>$\omega R_2 = 0.060$    | $R_1 = 0.1977$<br>$\omega R_2 = 0.2169$         |
| $R$ indices (all data)                 | $R_1 = 0.0325$<br>$\omega R_2 = 0.0842$           | $R_1 = 0.0363$<br>$\omega R_2 = 0.0622$   | $R_1 = 0.1073$<br>$\omega R_2 = 0.2663$         |

**Table S2** Selected bond lengths (Å) and angles (°) for complexes **C1-C6**

| <b>C1</b>   |             |             |             |
|-------------|-------------|-------------|-------------|
| Cu1—Cl2     | 2.2971 (14) | Cu1—Cl1     | 2.2399 (14) |
| Cu1—N1      | 2.075 (3)   | Cu1—N3      | 1.963 (4)   |
| Cl1—Cu1—Cl2 | 97.54 (6)   | N1—Cu1—Cl2  | 148.82 (13) |
| N1—Cu1—Cl1  | 93.45 (11)  | N3—Cu1—Cl2  | 94.07 (12)  |
| N3—Cu1—Cl1  | 167.66 (13) | N3—Cu1—N1   | 78.57 (15)  |
| <b>C2</b>   |             |             |             |
| Cu1—N5      | 2.021 (3)   | Cu1—N3      | 1.968 (3)   |
| Cu1—N1      | 2.025 (3)   | Cu1—N7      | 1.959 (3)   |
| Cu1—O5      | 2.372 (4)   |             |             |
| N5—Cu1—N1   | 176.30 (15) | N5—Cu1—O5   | 95.76 (15)  |
| N3—Cu1—N5   | 98.98 (14)  | N3—Cu1—N1   | 80.97 (13)  |
| N3—Cu1—O5   | 97.69 (15)  | N1—Cu1—O5   | 87.91 (14)  |
| N7—Cu1—N5   | 81.25 (14)  | N7—Cu1—N3   | 166.01 (15) |
| N7—Cu1—N1   | 97.89 (13)  | N7—Cu1—O5   | 96.19 (15)  |
| <b>C3</b>   |             |             |             |
| Cu1—N9      | 1.977 (2)   | Cu1—N3      | 1.979 (2)   |
| Cu1—N1      | 2.040 (3)   | Cu1—O9      | 1.964 (2)   |
| Cu2—N8      | 1.973 (2)   | Cu2—N6      | 2.018 (3)   |
| Cu2—N4      | 1.957 (3)   | Cu2—O13     | 2.436 (3)   |
| Cu2—O12     | 1.978 (2)   |             |             |
| N9—Cu1—N3   | 97.58 (10)  | N9—Cu1—N1   | 177.94 (10) |
| N3—Cu1—N1   | 80.72 (10)  | O9—Cu1—N9   | 94.18 (9)   |
| O9—Cu1—N3   | 164.92 (10) | O9—Cu1—N1   | 87.31 (10)  |
| N8—Cu2—N6   | 81.46 (10)  | N8—Cu2—O13  | 110.83 (11) |
| N8—Cu2—O12  | 165.03 (11) | N6—Cu2—O13  | 97.96 (11)  |
| N4—Cu2—N8   | 97.57 (10)  | N4—Cu2—N6   | 166.56 (11) |
| N4—Cu2—O13  | 94.92 (12)  | N4—Cu2—O12  | 92.23 (10)  |
| O12—Cu2—N6  | 91.59 (10)  | O12—Cu2—O13 | 56.78 (11)  |
| <b>C4</b>   |             |             |             |
| Cu1—Cl1     | 2.3357 (7)  | Cu1—Cl2     | 2.3969 (7)  |
| Cu1—O3      | 1.9715 (15) | Cu1—N1      | 2.1231 (16) |
| Cu1—N3      | 2.0207 (16) |             |             |
| Cl1—Cu1—Cl2 | 118.99 (2)  | O3—Cu1—Cl1  | 91.19 (5)   |
| O3—Cu1—Cl2  | 91.35 (6)   | O3—Cu1—N1   | 86.62 (6)   |
| O3—Cu1—N3   | 166.98 (6)  | N1—Cu1—Cl1  | 126.98 (5)  |
| N1—Cu1—Cl2  | 114.02 (5)  | N3—Cu1—Cl1  | 97.36 (5)   |
| N3—Cu1—Cl2  | 93.05 (5)   | N3—Cu1—N1   | 80.39 (6)   |
| <b>C5</b>   |             |             |             |
| Cu1—N1      | 1.997 (2)   | Cu1—N2      | 2.009 (2)   |
| Cu1—O3      | 1.9995 (17) | Cu1—O4      | 1.9720 (18) |
| O3—Cu1—N2   | 172.99 (11) | O4—Cu1—N1   | 169.56 (8)  |

|            |            |             |            |
|------------|------------|-------------|------------|
| O4—Cu1—N2  | 106.97 (8) | O4—Cu1—O3   | 71.44 (7)  |
| <b>C6</b>  |            |             |            |
| Cu1—O8     | 1.969 (7)  | Cu3—N12     | 1.956 (7)  |
| Cu1—O9     | 2.532 (9)  | Cu3—N18     | 1.954 (8)  |
| Cu1—N1     | 2.030 (9)  | Cu3—N20     | 2.566 (9)  |
| Cu1—N2     | 1.941 (8)  | Cu4—O15     | 1.973 (7)  |
| Cu1—N8     | 1.963 (8)  | Cu4—O17     | 2.547 (9)  |
| Cu1—N10    | 2.645 (11) | Cu4—N14     | 1.960 (8)  |
| Cu2—O5     | 1.982 (7)  | Cu4—N15     | 2.024 (9)  |
| Cu2—O7     | 2.485 (9)  | Cu4—N16     | 1.956 (8)  |
| Cu2—N4     | 1.961 (8)  | Cu4—N19     | 2.629 (10) |
| Cu2—N5     | 2.027 (8)  | Cu5—O29     | 2.479 (9)  |
| Cu2—N6     | 1.980 (8)  | Cu5—O30     | 1.999 (7)  |
| Cu2—N9     | 2.607 (12) | Cu5—N21     | 2.027 (9)  |
| Cu3—O18    | 1.992 (6)  | Cu5—N22     | 1.955 (8)  |
| Cu3—O19    | 2.499 (8)  | Cu5—N28     | 1.935 (9)  |
| Cu3—N11    | 2.026 (8)  | Cu5—N30     | 2.606 (10) |
| O8—Cu1—O9  | 54.8 (3)   | O15—Cu4—O17 | 55.2 (3)   |
| O8—Cu1—N1  | 91.2 (3)   | O15—Cu4—N15 | 91.2 (3)   |
| O8—Cu1—N10 | 28.2 (3)   | O15—Cu4—N19 | 27.8 (3)   |
| O9—Cu1—N10 | 26.7 (3)   | O17—Cu4—N19 | 27.4 (3)   |
| N1—Cu1—O9  | 96.9 (3)   | N14—Cu4—O15 | 93.3 (3)   |
| N1—Cu1—N10 | 96.4 (4)   | N14—Cu4—O17 | 91.5 (3)   |
| N2—Cu1—O8  | 165.0 (3)  | N14—Cu4—N15 | 170.5 (4)  |
| N2—Cu1—O9  | 112.8 (3)  | N14—Cu4—N19 | 91.6 (3)   |
| N2—Cu1—N1  | 81.6 (3)   | N15—Cu4—O17 | 98.0 (3)   |
| N2—Cu1—N8  | 96.7 (3)   | N15—Cu4—N19 | 96.3 (4)   |
| N2—Cu1—N10 | 139.3 (4)  | N16—Cu4—O15 | 164.9 (3)  |
| N8—Cu1—O8  | 92.8 (3)   | N16—Cu4—O17 | 112.6 (3)  |
| N8—Cu1—O9  | 93.9 (3)   | N16—Cu4—N14 | 96.1 (3)   |
| N8—Cu1—N1  | 168.8 (4)  | N16—Cu4—N15 | 81.4 (3)   |
| N8—Cu1—N10 | 92.0 (3)   | N16—Cu4—N19 | 139.7 (4)  |
| O5—Cu2—O7  | 56.1 (3)   | O29—Cu5—N30 | 27.9 (3)   |
| O5—Cu2—N5  | 90.8 (3)   | O30—Cu5—O29 | 56.1 (3)   |
| O5—Cu2—N9  | 28.1 (3)   | O30—Cu5—N21 | 90.6 (3)   |
| O7—Cu2—N9  | 28.1 (3)   | O30—Cu5—N30 | 28.5 (3)   |
| N4—Cu2—O5  | 94.3 (3)   | N21—Cu5—O29 | 93.7 (3)   |
| N4—Cu2—O7  | 99.7 (3)   | N21—Cu5—N30 | 89.7 (3)   |
| N4—Cu2—N5  | 170.5 (3)  | N22—Cu5—O29 | 109.0 (3)  |
| N4—Cu2—N6  | 95.7 (4)   | N22—Cu5—O30 | 162.8 (3)  |
| N4—Cu2—N9  | 99.7 (3)   | N22—Cu5—N21 | 81.2 (3)   |
| N5—Cu2—O7  | 89.8 (3)   | N22—Cu5—N30 | 135.5 (4)  |
| N5—Cu2—N9  | 88.5 (4)   | N28—Cu5—O29 | 96.5 (3)   |
| N6—Cu2—O5  | 163.2 (3)  | N28—Cu5—O30 | 94.1 (3)   |

|             |           |             |           |
|-------------|-----------|-------------|-----------|
| N6—Cu2—O7   | 108.7 (3) | N28—Cu5—N21 | 169.7 (4) |
| N6—Cu2—N5   | 81.3 (4)  | N28—Cu5—N22 | 96.4 (4)  |
| N6—Cu2—N9   | 136.1 (4) | N28—Cu5—N30 | 98.8 (3)  |
| O18—Cu3—O19 | 56.7 (3)  | O25—Cu6—O27 | 55.4 (3)  |
| O18—Cu3—N11 | 90.4 (3)  | O25—Cu6—N25 | 91.6 (4)  |
| O18—Cu3—N20 | 29.3 (3)  | O25—Cu6—N26 | 165.0 (4) |
| O19—Cu3—N20 | 27.6 (3)  | O25—Cu6—N29 | 27.8 (3)  |
| N11—Cu3—O19 | 90.0 (3)  | O27—Cu6—N29 | 27.6 (3)  |
| N11—Cu3—N20 | 87.4 (3)  | N24—Cu6—O25 | 92.9 (3)  |
| N12—Cu3—O18 | 163.5 (3) | N24—Cu6—O27 | 93.6 (3)  |
| N12—Cu3—O19 | 108.6 (3) | N24—Cu6—N25 | 171.0 (4) |
| N12—Cu3—N11 | 81.7 (3)  | N24—Cu6—N26 | 95.5 (4)  |
| N12—Cu3—N20 | 135.1 (4) | N24—Cu6—N29 | 92.8 (3)  |
| N18—Cu3—O18 | 94.9 (3)  | N25—Cu6—O27 | 95.4 (3)  |
| N18—Cu3—O19 | 101.4 (3) | N25—Cu6—N29 | 94.9 (4)  |
| N18—Cu3—N11 | 168.5 (3) | N26—Cu6—O27 | 111.6 (3) |
| N18—Cu3—N12 | 95.6 (3)  | N26—Cu6—N25 | 81.8 (4)  |
| N18—Cu3—N20 | 102.2 (3) | N26—Cu6—N29 | 139.0 (3) |

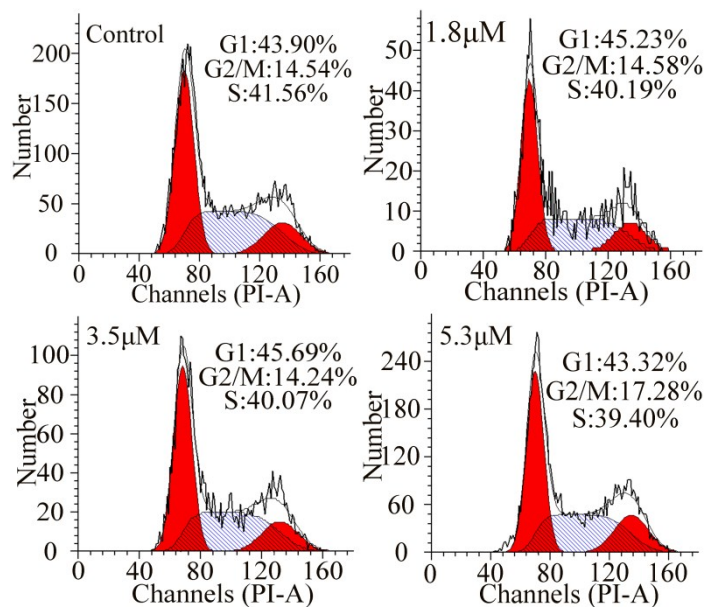

Figure S1: Analysis of cell cycle arrest by flow cytometry in T24 cells after 24 h treatment with C1.

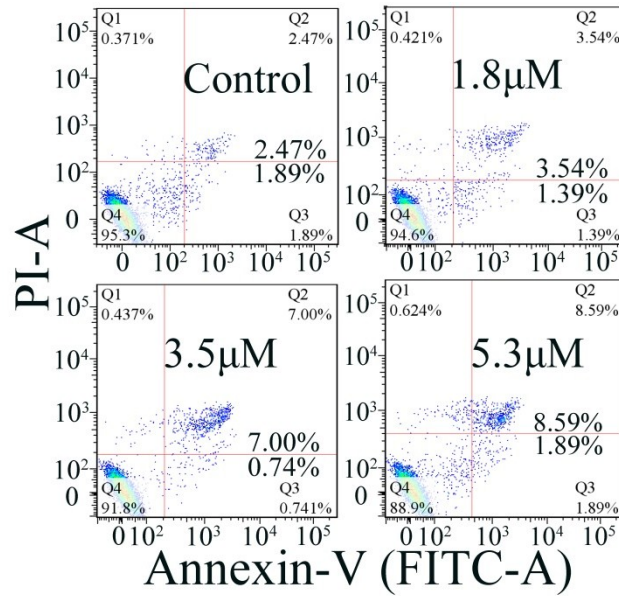

Figure S2: Apoptosis of T24 cells induced by C1, detected using flow cytometry after 24 h.

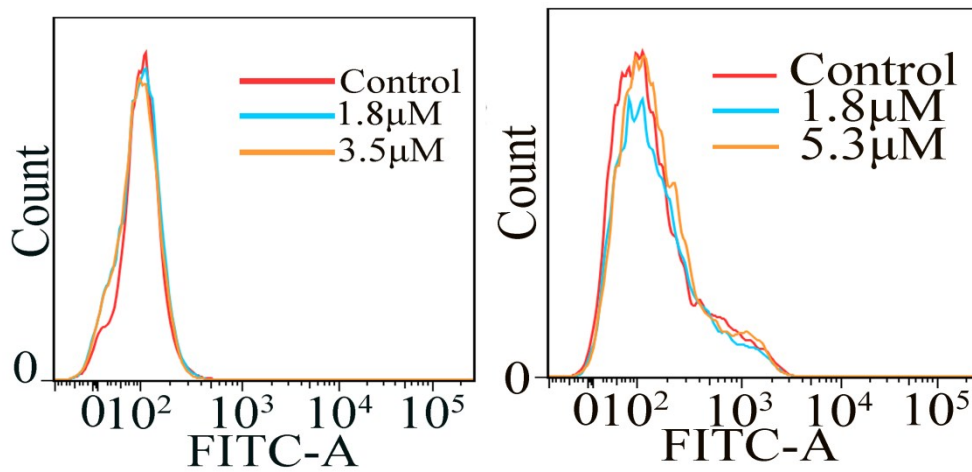

Figure S3: Analysis of reactive oxygen species level and calcium release by flow cytometry in T24 cells after 24 h treatment with C1.

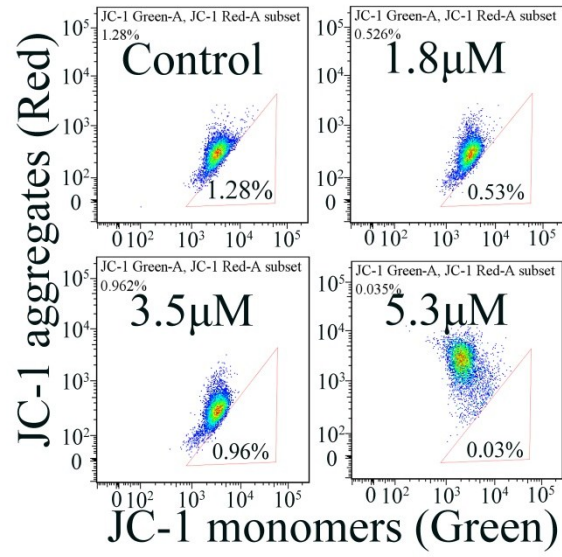

Figure S4: Measurement of mitochondrial membrane potential by flow cytometry in T-24 cells after 24 h treatment with C1.

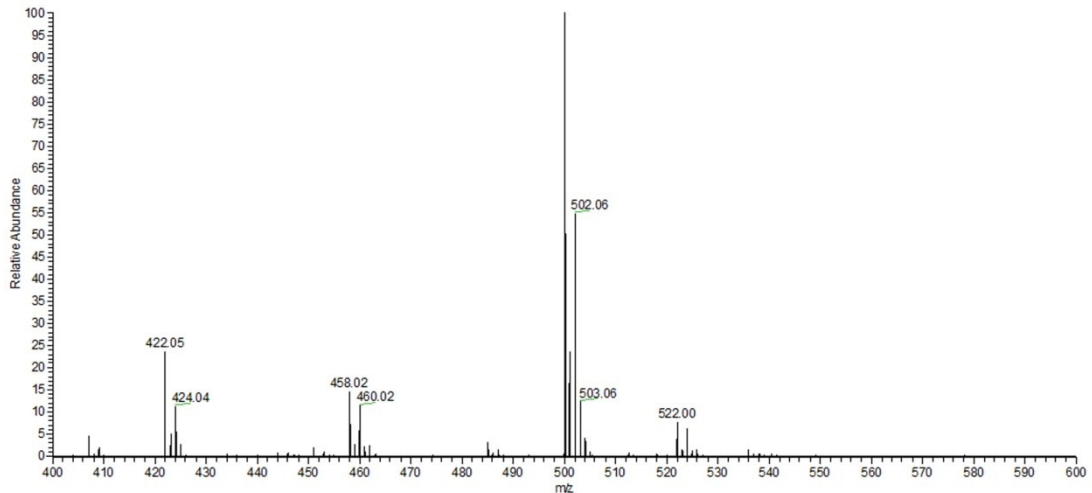

Figure S5: Mass Spectrum of C1



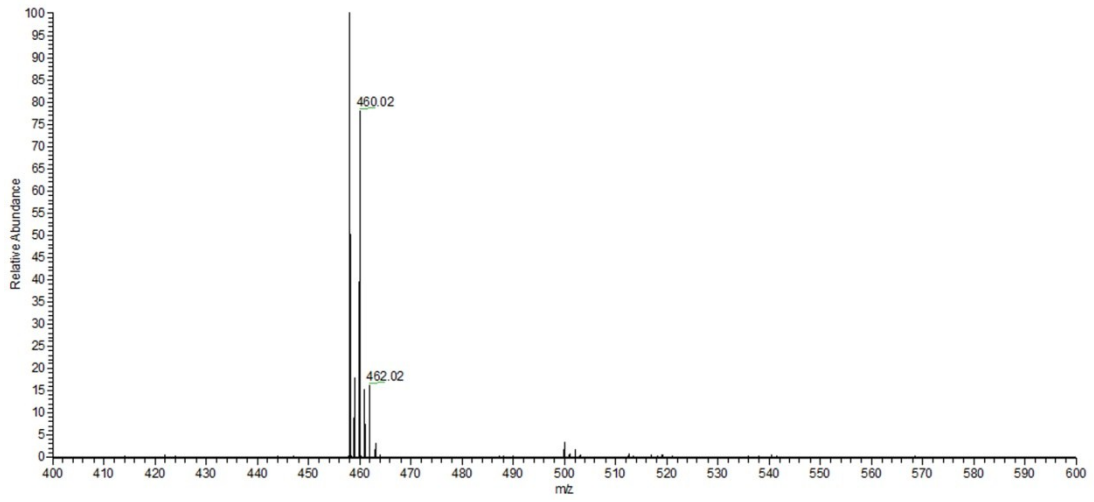

Figure S6: Mass Spectrum of C2

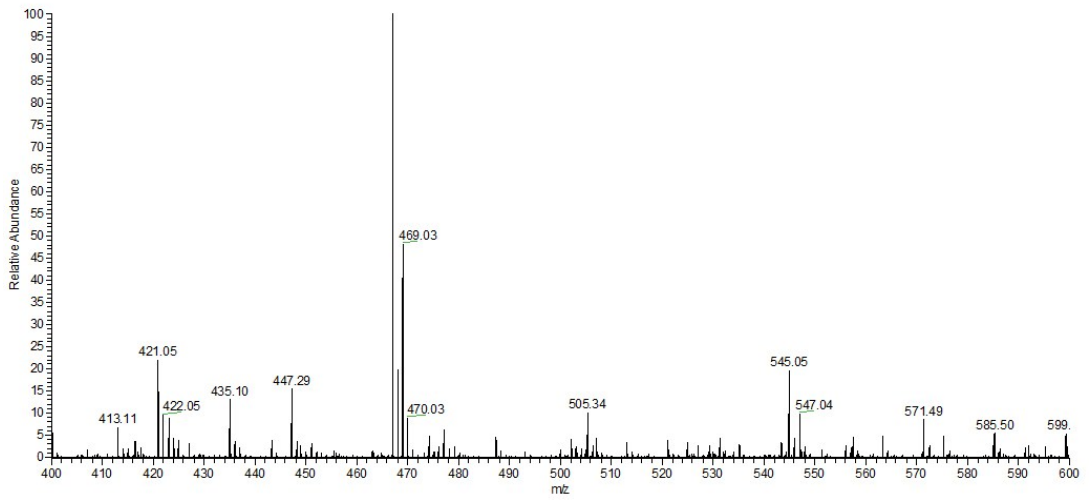

Figure S7: Mass Spectrum of C3

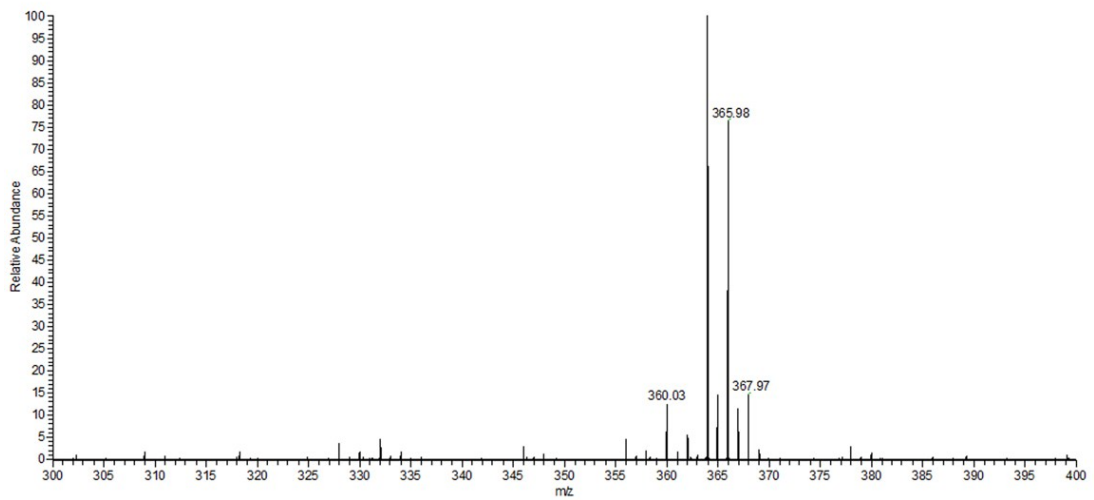

Figure S8: Mass Spectrum of C4

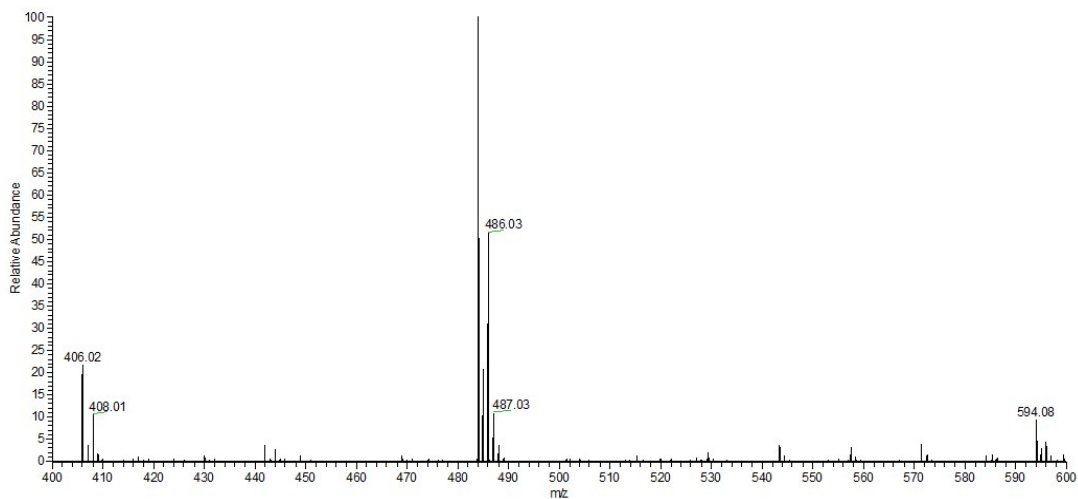

Figure S9: Mass Spectrum of C5

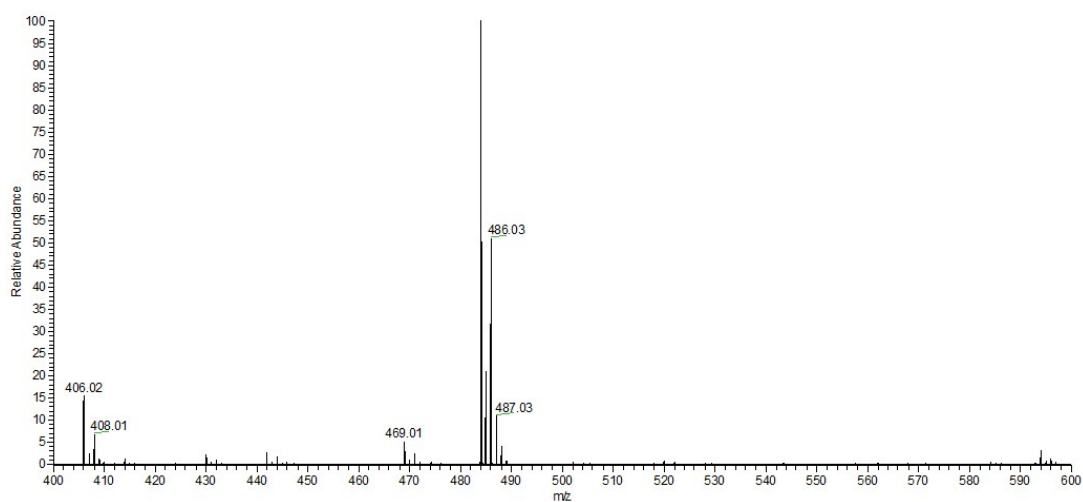

Figure S10: Mass Spectrum of C6

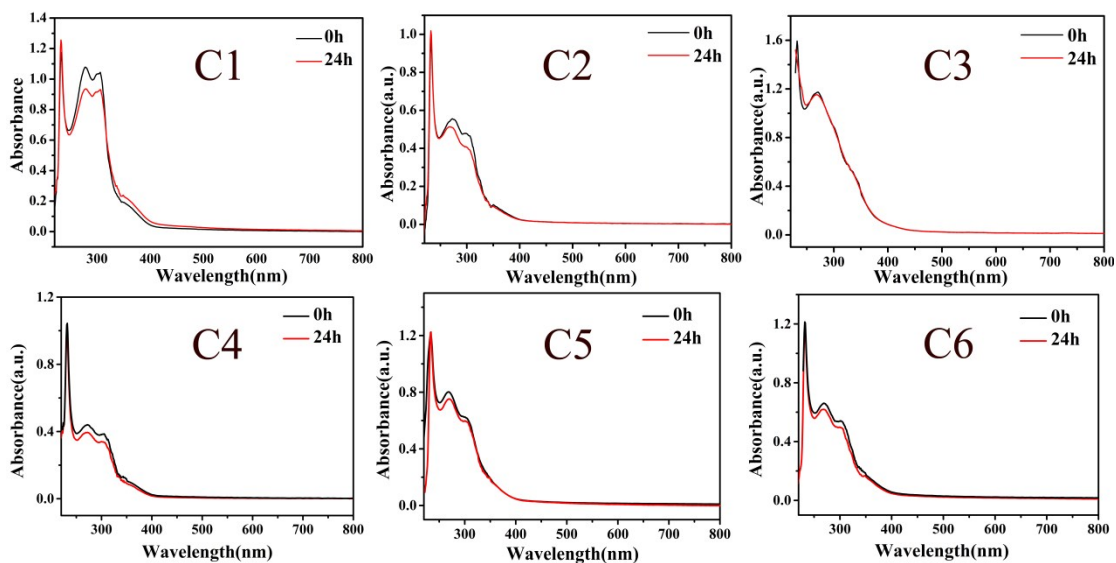

Figure S11: UV-Vis Spectrum of C1-C6

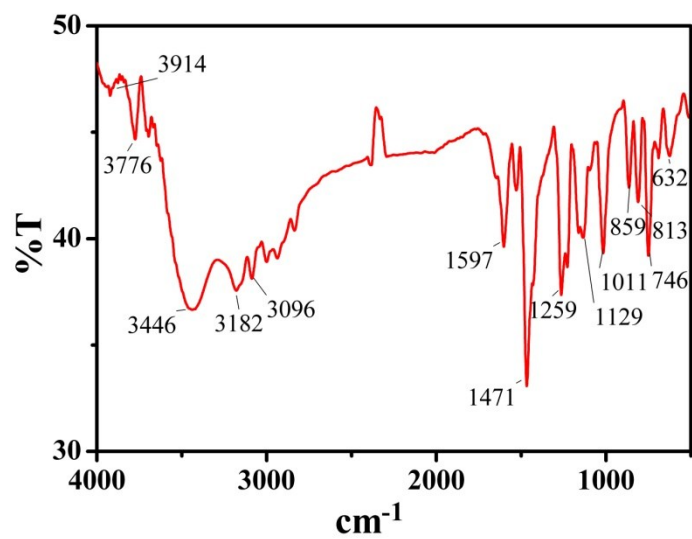

Figure S12: Infrared spectrum of L<sup>1</sup>

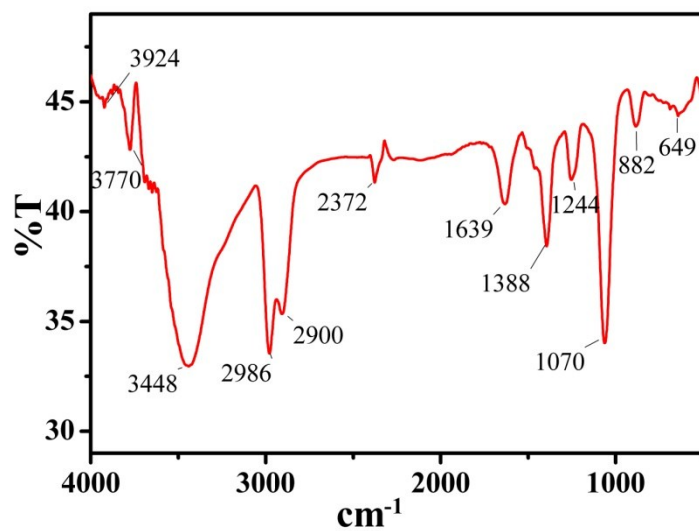

Figure S13: Infrared spectrum of L<sup>2</sup>

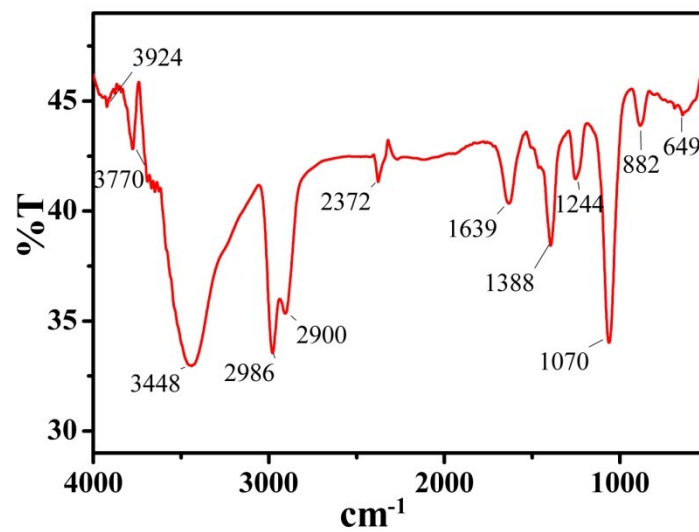

Figure S14: Infrared spectrum of C1

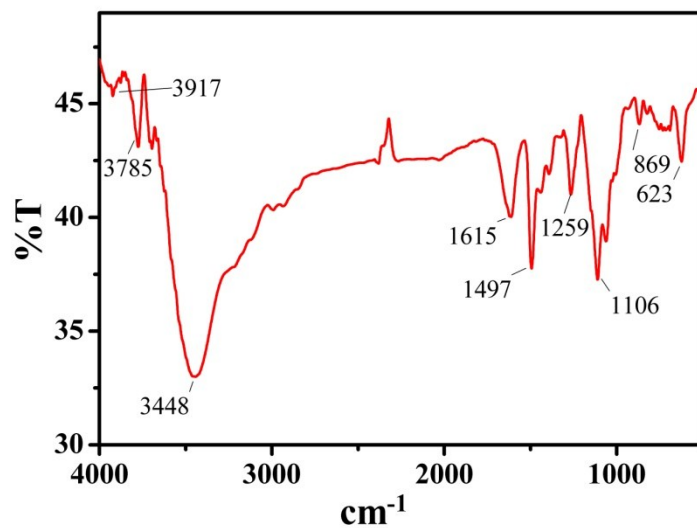

Figure S15: Infrared spectrum of C2

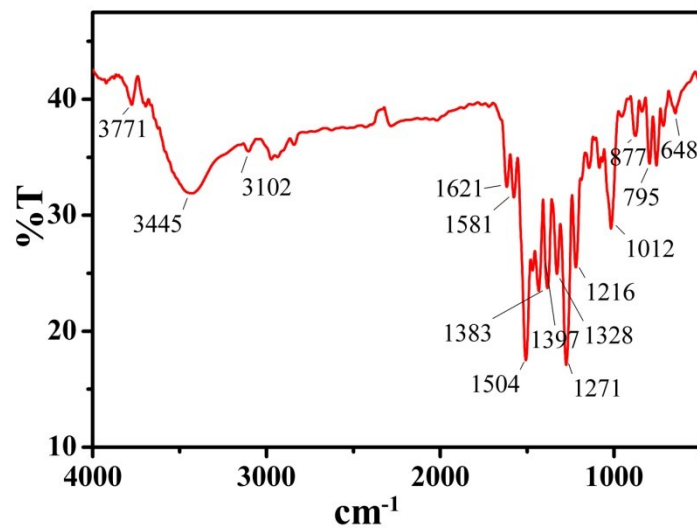

Figure S16: Infrared spectrum of C3

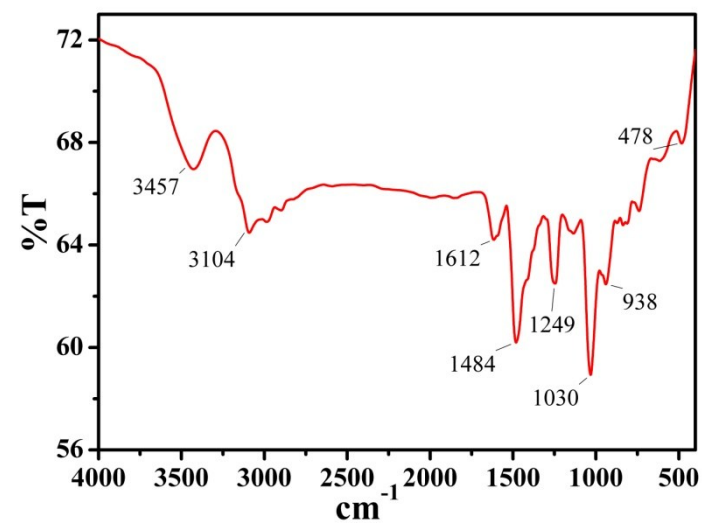

Figure S17: Infrared spectrum of C4

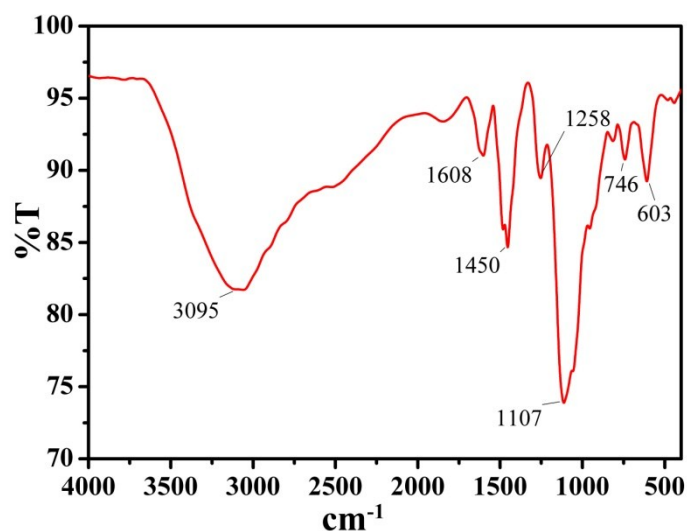

Figure S18: Infrared spectrum of C5

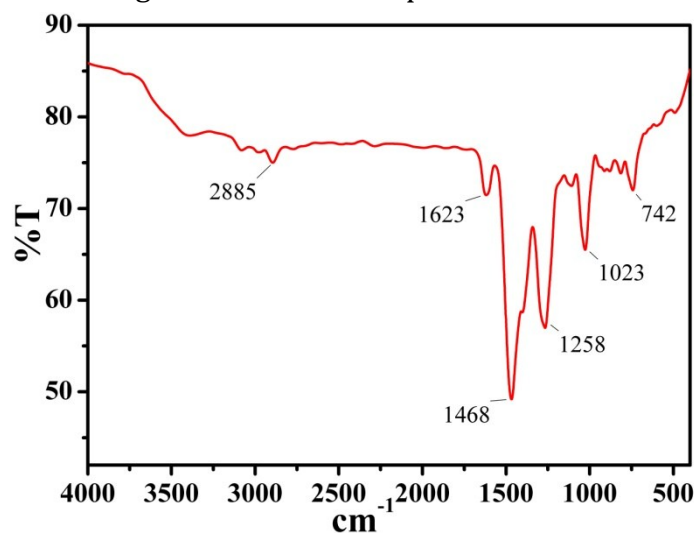

Figure S19: Infrared spectrum of C6

## Experimental detail

### Synthesis of L<sup>1</sup> and L<sup>2</sup>

The synthetic route of the ligand L<sup>1</sup> and L<sup>2</sup> is shown in Fig.S20. Briefly, To a solution of sodium alkoxide solution was added 2,3-dimethoxybenzotrile(20 mmol, 2.94 g). The reaction mixture was stirred for 2 h at room temperature. Then, to the resulting solution, adding picolinohydrazide (20 mmol, 2.74 g) and refluxed for 24 h at 85 °C. After cooling, the products was washing with water, collect solid, then using acetic acid to adjust the pH to neutral, obtaining a yellow solid product. Recrystallization gave pale yellow powder (yield: 65 %). Elemental analysis: calculated (%) for L<sup>1</sup>, C<sub>15</sub>H<sub>14</sub>N<sub>4</sub>O<sub>2</sub> (282.11): C, 63.80; H, 4.96; N, 19.85. Found (%): C, 61.93; H, 3.75; N, 21.29. ESI-MS: m/z=289.07 [L<sup>1</sup>-Na]<sup>+</sup>. FT-IR [KBr phase, cm<sup>-1</sup>]: 3914 w, 3776 m, 3446 m, 3182 m, 3096 m, 1597 s, 1471 s, 1259 s, 1129 m, 1011 s, 859 m, 813 m, 746 s, 632 m. The same synthetic procedure as that for L<sup>1</sup> except that 2,3-dimethoxybenzotrile was replaced by piperonylnitrile, and yellow block crystals were obtained in 70 % yield. Elemental analysis: calculated (%) for L<sup>2</sup>, C<sub>14</sub>H<sub>10</sub>N<sub>4</sub>O<sub>2</sub> (266.26): C, 63.10; H, 3.76; N, 21.03. Found (%): C, 63.32; H, 3.58; N, 21.94. ESI-MS(+): m/z=289.07 [L<sup>2</sup>-Na]<sup>+</sup>. FT-IR [KBr phase, cm<sup>-1</sup>]: 3431 w, 2899 w,

1595 w, 1462 s, 1411 s, 1246 s, 1133 w, 1039 s, 935 s, 867 s, 740 m, 561 w.

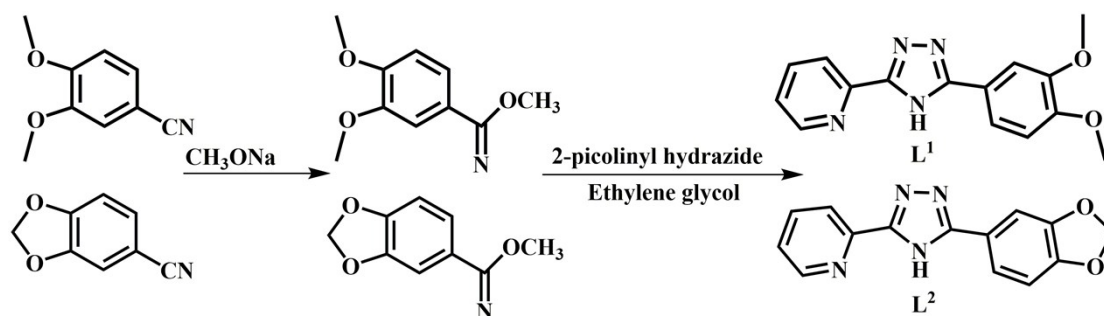

Figure S20: Synthetic route of  $L^1$  and  $L^2$

### Synthesis of C1-C6

**[Cu( $L^1$ )Cl<sub>2</sub>] $\cdot$ 0.25H<sub>2</sub>O (C1)** A mixture solution (10 mL) containing  $L^1$  (0.3 mmol, 0.08463 g), CuCl<sub>2</sub> $\cdot$ 2H<sub>2</sub>O (0.3 mmol, 0.0511 g) and methanol (10 mL) in a Teflon-lined stainless steel vessel (23 mL) was heated at 80 °C for 48 h and then cooled to room temperature at 5 °C/h. Green block crystals were obtained in 65 % yield. Elemental analysis: calculated (%) for C<sub>15</sub>H<sub>14.5</sub>Cl<sub>2</sub>CuN<sub>4</sub>O<sub>2.25</sub> (421.24): C, 42.73; H, 3.44; N, 13.29. Found (%): C, 40.62; H, 2.79; N, 14.51. ESI-MS(+): m/z=500.06 [Cu( $L^1$ )]<sup>+</sup> $\cdot$ 2DMSO. FT-IR [KBr, cm<sup>-1</sup>]: 3924 w, 3770 m, 3448 s, 2986 s, 2900 w, 2372 w, 1639 m, 1388 s, 1244 m, 1070 s, 882 w, 649 w.

**[Cu( $L^1$ )<sub>2</sub>(ClO<sub>4</sub>)] $\cdot$ ClO<sub>4</sub> (C2)** C2 was obtained by a similar method as described for C1 using Cu(ClO<sub>4</sub>)<sub>2</sub> $\cdot$ 6H<sub>2</sub>O (0.3 mmol, 0.1111 g) in place of CuCl<sub>2</sub> $\cdot$ 2H<sub>2</sub>O. Green block crystals were obtained in 60 % yield. Elemental analysis: calculated (%) for C<sub>30</sub>H<sub>28</sub>Cl<sub>2</sub>CuN<sub>8</sub>O<sub>12</sub> (827.04): C, 43.53; H, 3.38; N, 13.54. Found (%): C, 42.03; H, 3.12; N, 15.13. ESI-MS(+): m/z=458.02 [Cu( $L^1$ )]<sup>+</sup> $\cdot$ MeOH $\cdot$ 2CH<sub>3</sub>CN. FT-IR [KBr, cm<sup>-1</sup>]: 3917 w, 3785 m, 3448 s, 1615 s, 1497 s, 1259 s, 1106 s, 869 w, 623 m.

**[Cu<sub>2</sub>( $L^1$ )<sub>2</sub>(NO<sub>3</sub>)<sub>2</sub>] $\cdot$ CH<sub>3</sub>CN (C3)** C3 was obtained by a similar method as described for C1 using Cu(NO<sub>3</sub>)<sub>2</sub> $\cdot$ 3H<sub>2</sub>O (0.3 mmol, 0.0725 g) in place of CuCl<sub>2</sub> $\cdot$ 2H<sub>2</sub>O. Surprisingly, this ligand was nitrified in the reaction process. Green block crystals were obtained in 65 % yield. Elemental analysis: calculated (%) for C<sub>32</sub>H<sub>29</sub>Cu<sub>2</sub>N<sub>13</sub>O<sub>14</sub> (946.76): C, 40.56; H, 3.06; N, 19.22. Found (%): C, 38.98; H, 3.32; N, 21.12. ESI-MS(+): m/z=467.03 [Cu( $L^1$ )]<sup>+</sup> $\cdot$ 2DMSO. FT-IR [KBr, cm<sup>-1</sup>]: 3771 w, 3445 m, 3102 w, 2968 w, 1621 m, 1581 m, 1504 s, 1397 s, 1383 m, 1328 m, 1271 s, 1216 s, 1012 s, 877 w, 795 m, 648 w.

**[Cu( $L^2$ )(DMSO)Cl<sub>2</sub>] $\cdot$ DMSO (C4)** A mixture solution (11 mL) containing  $L^2$  (0.3 mmol, 0.0798 g), CuCl<sub>2</sub> $\cdot$ 2H<sub>2</sub>O (0.3 mmol, 0.0511 g), ethanol (10 mL) and DMSO (1 mL) in a Teflon-lined stainless steel vessel (23 mL) was heated at 80 °C for 48 h and then cooled to room temperature at 5 °C/h. Yellow block crystals were obtained in 60 % yield. Elemental analysis: calculated (%) for C<sub>18</sub>H<sub>22</sub>Cl<sub>2</sub>CuN<sub>4</sub>O<sub>4</sub>S<sub>2</sub> (556.99): C, 38.78; H, 3.95; N, 10.05. Found (%): C, 38.65; H, 3.82; N, 10.12. ESI-MS(+): m/z=363.98 [Cu( $L^2$ )]<sup>+</sup> $\cdot$ 2H<sub>2</sub>O. FT-IR [KBr, cm<sup>-1</sup>]: 3426 w, 3097 w, 1609 w, 1477 s, 1419 m, 1252 s, 1148 w, 1035 s, 985 w, 932 w, 736 w, 473 w.

**[Cu( $L^2$ )SO<sub>4</sub>] $\cdot$ CH<sub>3</sub>OH (C5)** A mixture solution (10 mL) containing  $L^2$  (0.3 mmol, 0.0798 g), CuSO<sub>4</sub> $\cdot$ 5H<sub>2</sub>O (0.3 mmol, 0.0749 g) and methanol (10 mL) in a Teflon-lined stainless steel vessel (23 mL) was heated at 80 °C for 48 h and then cooled to room temperature at 5 °C/h. Green block crystals were obtained in 70 % yield. Elemental analysis: calculated (%) for C<sub>14</sub>H<sub>10</sub>CuN<sub>4</sub>O<sub>6</sub>S $\cdot$ CH<sub>4</sub>O (457.90): C, 39.31; H, 3.06; N, 12.23. Found (%): C, 39.42; H, 3.15; N, 12.34. ESI-MS(+): m/z=484.03

[Cu(L<sup>2</sup>)]<sup>+</sup>•2DMSO. FT-IR [KBr phase, cm<sup>-1</sup>]: 3057 m, 2904 w, 1614 w, 1469 m, 1437 m, 1260 m, 1124 s, 1036 s, 973 m, 930 m, 740 m, 621 m, 427 w.

[Cu<sub>2</sub>(L<sup>2</sup>)<sub>2</sub>(NO<sub>3</sub>)<sub>2</sub>]•C<sub>2</sub>H<sub>5</sub>OH (C6). A mixture solution (10 mL) containing L<sup>2</sup> (0.3 mmol, 0.0798 g), Cu(NO<sub>3</sub>)<sub>2</sub>•3H<sub>2</sub>O (0.3 mmol, 0.0725 g) and ethanol(10 mL) in a Teflon-lined stainless steel vessel (23 mL) was heated at 80 °C for 48 h and then cooled to room temperature at 5 °C/h. Green flake crystals were obtained in 50 % yield. Elemental analysis: calculated (%) for C<sub>28</sub>H<sub>18</sub>Cu<sub>2</sub>N<sub>10</sub>O<sub>10</sub>•C<sub>2</sub>H<sub>5</sub>OH (827.69): C, 43.49; H, 2.90; N, 16.91. Found (%): C, 43.56; H, 2.82; N, 17.84. ESI-MS(+): m/z=484.03 [Cu(L<sup>2</sup>)]<sup>+</sup>•2DMSO. FT-IR [KBr phase, cm<sup>-1</sup>]: 3396 w, 2896 w, 1616 m, 1473 s, 1386 m, 1284 s, 1244 s, 1115 w, 1036 s, 932 w, 887 w, 753 m, 588 w.

### Cellular studies

T24 cells were plated in 10-mm culture dishes at a density of 106 cells per mL and incubated in a 5% CO<sub>2</sub> and 37 °C incubator for 24 h, after the addition of 3.5 μM C1, C4 and further incubation for 24 h. After the treatment, the complex-containing medium was removed and cells were washed with ice-cold PBS three times and harvested in a tube. Then, the cytomembrane, nuclei, mitochondria, and remaining cytoplasm protein were extracted with the corresponding kit (Beyotime Biological Co., Ltd. Shanghai, china), respectively, and quantified by ICP-MS analysis (The copper content of the control group has been deducted).

### MTT assay

In-vitro cytotoxicity activities of all complexes were measured by a colorimetric MTT assay. All complexes were dissolved in DMSO and further diluted to the required concentrations with cell culture medium. Briefly, cells (10<sup>4</sup> cells/well) were cultured in 96-well plates and controlled in an environment of 37 °C, 5 % CO<sub>2</sub> for 24 h to allow cells attachment. Cells were treated with increasing concentrations (5, 10, 20, 50, 100 μM and 1.25, 2.5, 5, 10, 20 μM) of prepared complexes solution, and incubated for another 24 h. In addition, the corresponding blank control group was setting. 10 μL of MTT (5 mg/mL) solution was added to each well after incubation. After 1-4 h, the supernatant was aspirated, and the formed formazan crystal was dissolved by adding 100 μL of DMSO to each well. The absorbance of resulting solution was determined at 490 nm by enzyme labeling instrument. (Infinite M1000) IC<sub>50</sub> values of each complex that induced 50 % inhibition of cell growth were calculated using SPSS software. Each test was repeated three times independently.

### Cell cycle analysis

Flow cytometry was used to investigated the effect of T-24 cells on cell cycle after treated with various concentrations (0, 1.8, 3.5 and 5.3 μM) of C4. Briefly, cells suspension (10<sup>5</sup> cells/mL) was seeded in 70×70 mm culture dishes and incubated for 12 h, then treated with for 24 h. The harvested cells were fixed with 70 % ice-cold ethanol and stored in a refrigerator overnight at -20 °C. The cells were washed by PBS Buffer and resuspended in freshly-concentrated RNase (100 μg/mL) solution at 37 °C for 30 min in the dark. 25 μL of PI (50 μg/mL) was added to each sample, subsequently. After 10 min dark staining, the cell cycle distribution was measured by flow cytometry.

### Annexin V-FITC/PI dual staining studies

T24 cells were seeded into 6-well plates at a density of 10<sup>5</sup> cells/well for 24 h at incubator (37 °C, 5 % CO<sub>2</sub>). Then, various concentrations (0, 1.8, 3.5 and 5.3 μM) of C4 was added each well, incubated for another 24 h. The cells were harvested by trypsinization and resuspended in 500 μL of PBS binding buffer and incubated with 5 μL Annexin V-FITC (100 ng/mL) for 30 min in the dark at 37 °C, and then adding 5 μL propidium iodide (2 μg/mL). Lastly, the apoptosis results were detected by flow

cytometry.

### **Reactive oxygen species (ROS) level analysis**

Cytometry method was used to detect ROS level in T-24 cells with a ROS assay kit. T-24 cells were treated with **C4** at different concentrations (i.e., 0, 1.8 and 3.5  $\mu\text{M}$ ). After 24 hours of incubation, cells were washed and harvested, subsequently. Next, cells were resuspended in reactive oxygen stain solution (DCFH-DA, 100  $\mu\text{M}$ ) at 37 °C for 20 min in the dark. The levels of intracellular ROS were investigated by flow cytometry. Data acquisition and analyses were carried out using FlowJo software.

### **Detection of calcium release**

In the process of apoptosis, the increase of calcium ions concentration is closely related to the production and accumulation of ROS, interacting with reactive oxygen species. Calcium release level was detected by cytometry method with an calcium assay kit. T-24 cells were treated with various concentrations (0, 1.8 and 3.5  $\mu\text{M}$ ) of **C4**. The cells were harvested by trypsinization after 24 h and resuspended in Fluo-3 AM staining solution (5  $\mu\text{M}$ ) at 37 °C for 20 min in the dark. And then, the cells were washed with DMEM medium to remove the extra Fluo-3 AM completely. The cells were suspended in DMEM medium (500  $\mu\text{L}$ ) and measured by flow cytometry.

### **Mitochondrial membrane potential (JC-1) studies**

Mitochondrial membrane potential was detected by cytometry method with a JC-1 assay kit. T-24 cells were treated with various concentrations (0, 1.8, 3.5 and 5.3  $\mu\text{M}$ ) of **C4**. The cells were harvested by trypsinization after 24 h and resuspended in JC-1 staining solution (5X) at 37 °C for 20 min in the dark. Subsequently, the cells were washed three times by JC-1 (1X) Staining Buffer. The cells were measured by flow cytometry and data was analyzed by FlowJo software.

### **Caspases activation assay**

The activity of Caspase-3/8/9 was determined by CaspGLOW™ Fluorescein Active Caspase-3/8/9 Staining Kit, respectively. T24 cells were treated with **C4** (1.8, 3.5, 5.3  $\mu\text{M}$ ) for 24 h. Cells were harvested and washed with PBS buffer solution, 300  $\mu\text{L}$  PBS containing the staining solution (FITC-DEVD-FMK, FITC-IETD-FMK and FITC-LEHD-FMK, 1  $\mu\text{L}$ , respectively) was added subsequently and incubated at 37 °C for 50 min. A flow cytometer was employed to detect Caspase-3/8/9 activity.

### **Western blot assay**

Western blot analysis was performed with the concentration of **C4** ( $\text{IC}_{50}$ ,  $2 \times \text{IC}_{50}$ ), the total protein of T24 cells were harvested in a RIPA buffer. Proteins were isolated from acrylamide gel (12%) and transferred to PVDF membrane, then incubated overnight at 4 °C with specific antibodies (APAF-1, Bax, Bcl-2, Cyto-c and  $\beta$ -Actin). After wash with TBST buffer ( $3 \times 10$  min), the PVDF membranes were incubated with secondary antibodies (1:2000) at room temperature for 1 h. After repeated washing, PVDF membranes were visualized using an enhanced ECL detection kit by chemiluminescence system (Kodak, Rochester, NY, USA).

### **Bovine Serum Albumin Binding Studies**

#### **UV-Vis Spectra**

The BSA stock solution (1  $\mu\text{M}$ ) was prepared in advance in 50 mM phosphate buffer saline (PBS)/100 mM NaCl buffer at pH 7.4 and stored at 4 °C. A BSA solution (3 mL,  $1 \times 10^{-6}$  M) was titrated by successive additions of the stock solutions of **C1/C4** ( $2.0 \times 10^{-5}$  M) and the variations in the BSA absorption were recorded after each addition. The spectrum was scanned by a Cary 60 UV-visible spectrophotometer on the range of wavelength from 195 to 315 nm.



## Fluorescence Spectra

Consistent with the above experiment, 3.0 mL of BSA solution ( $1.0 \times 10^{-6}$  M) were added into quartz colorimetric utensil (1 cm), following, 1  $\mu$ L stock solutions of C1/C4 ( $2.0 \times 10^{-3}$  M) were added gradually, the fluorescence intensity was recorded from 290 to 490 nm at 25 °C, the excitation wavelength was 280 nm, the slit width of the excitation and emission was 5 nm, using fluorescence spectrophotometer (Cary Eclipse, Agilent).

## Competitive Binding Experiments

### UV-Vis Spectra

CT-DNA was gradually added into the mixed solution of 3.0 mL Tris-HCl-NaCl buffer (5 mM Tris-HCl and 50 mM NaCl, pH 7.35 at 25 °C) and at a constant concentration of C1/C4. The absorption spectrum was recorded in the wavelength range of 250-500 nm.

### Fluorescence Spectra

The solutions of GelRed and CT-DNA mixture ( $[\text{GelRed}]/[\text{CT-DNA}] = 1:10$ ) were pre-incubated at -4 °C. The variation of emission spectra was recorded by the addition of a 30  $\mu$ L of C1/C4 stock solutions step by step into the 3.0 mL mixture of GelRed and CT-DNA. The fluorescence quenching curves were recorded using fluorescence spectrophotometer. All samples were excited at 510 nm, and emission spectra were observed at about 600 nm.

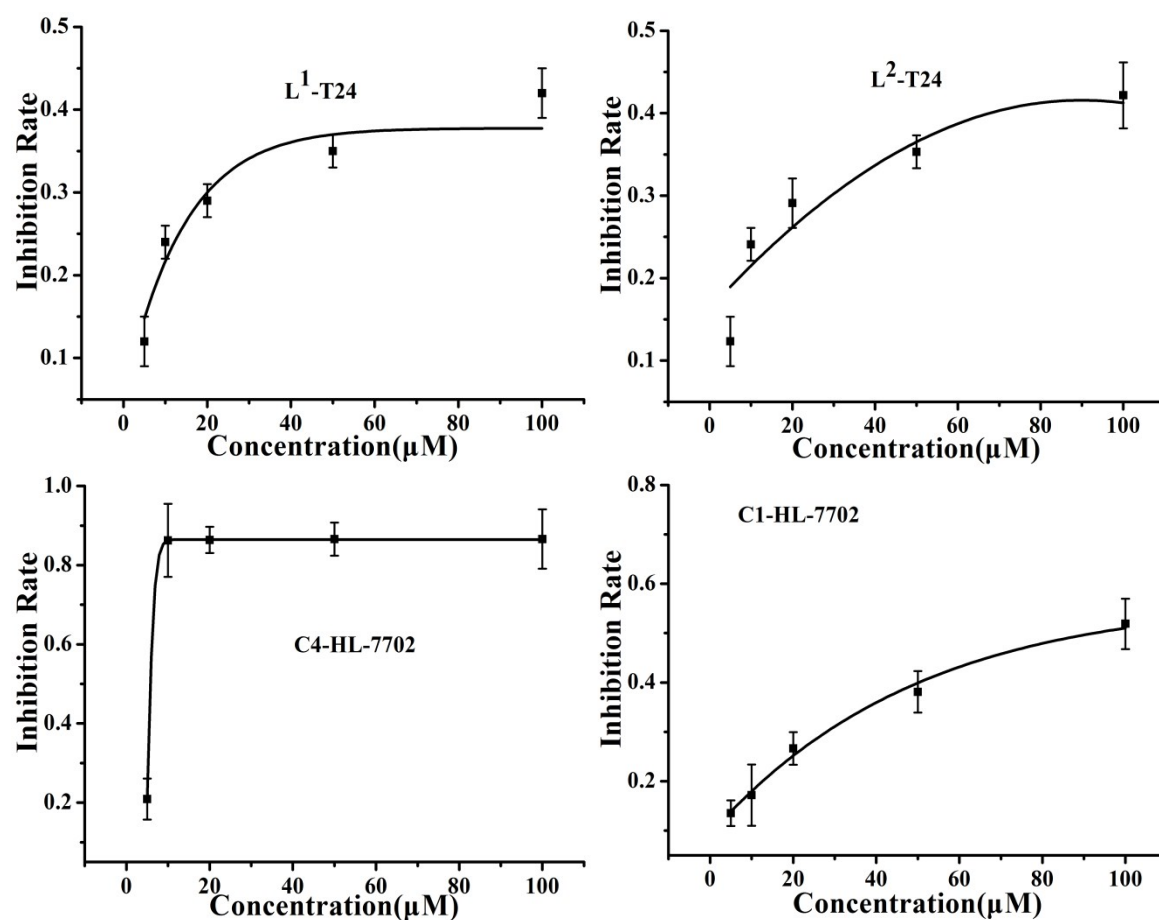

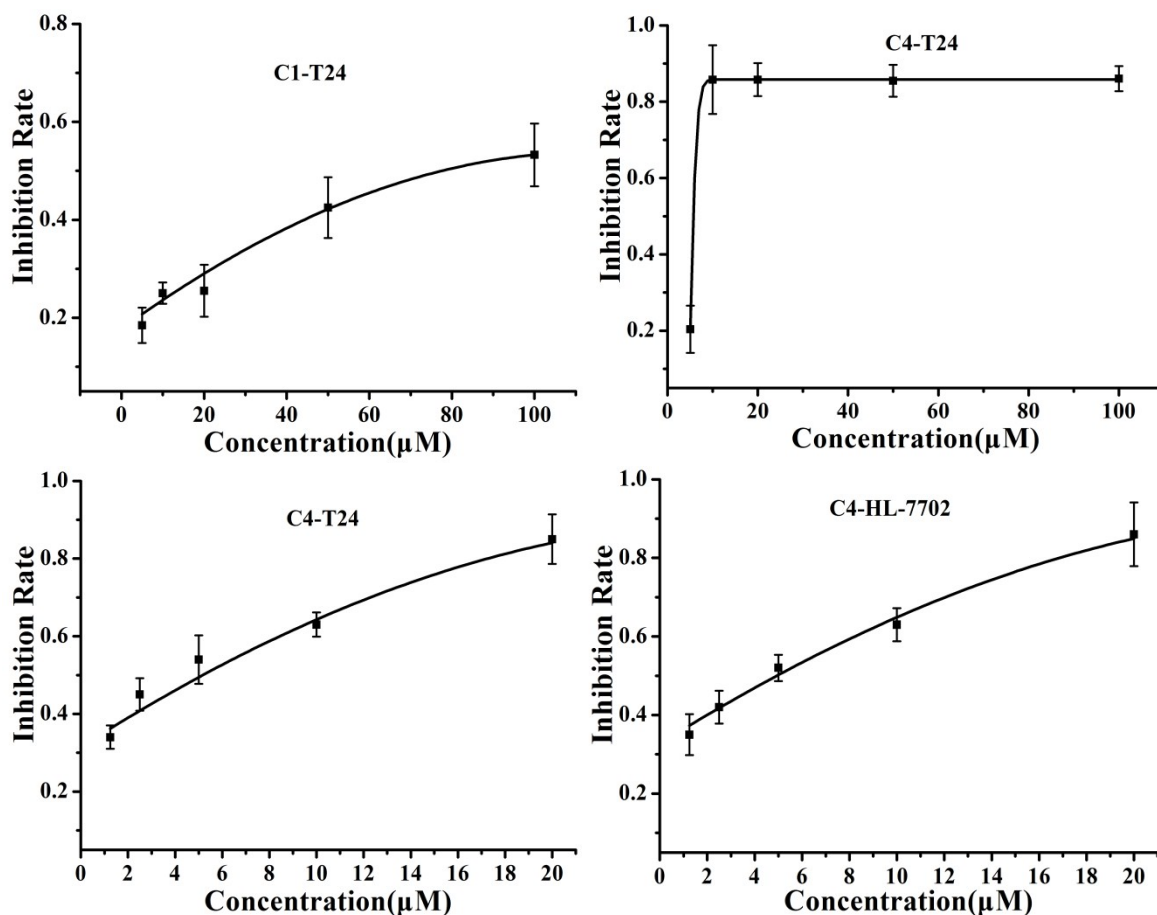

Figure S21: Parts of  $\text{IC}_{50}$  plots of compounds towards T24 and HL-7702 cells.

### Abbreviations

T24 (human bladder cancer cell line)

Hep-G2 (human hepatocellular carcinoma cell line)

MGC-803 (human gastric cancer cell line)

HeLa (human cervical cancer cell line)

A549 (non-small cell lung cancer cell line)

NCI-H460 (large cell lung cancer cell line)

HL-7702 (human normal liver cell line)
